# Supplementary material
Source: Springer Nature journal article supplement (https://www.springermedizin.de/resource/supplementary/12888_2011_863_MOESM3_ESM.pdf/9478392)

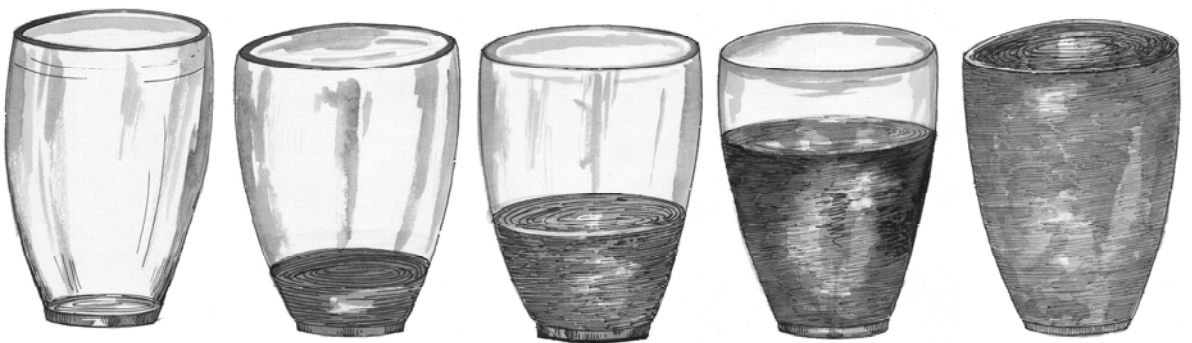

0

1

2

3

4

“not at all”

“extremely/always”

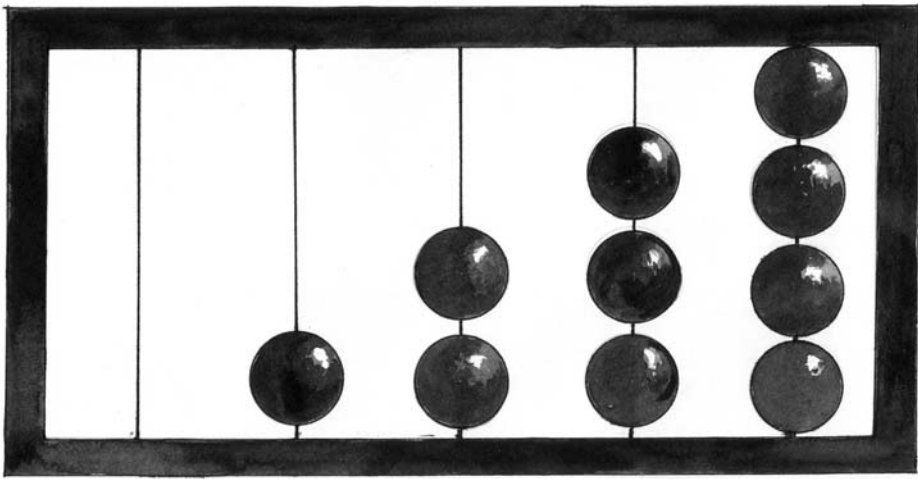

0

1

2

3

4

“not at all”

“extremely/always”

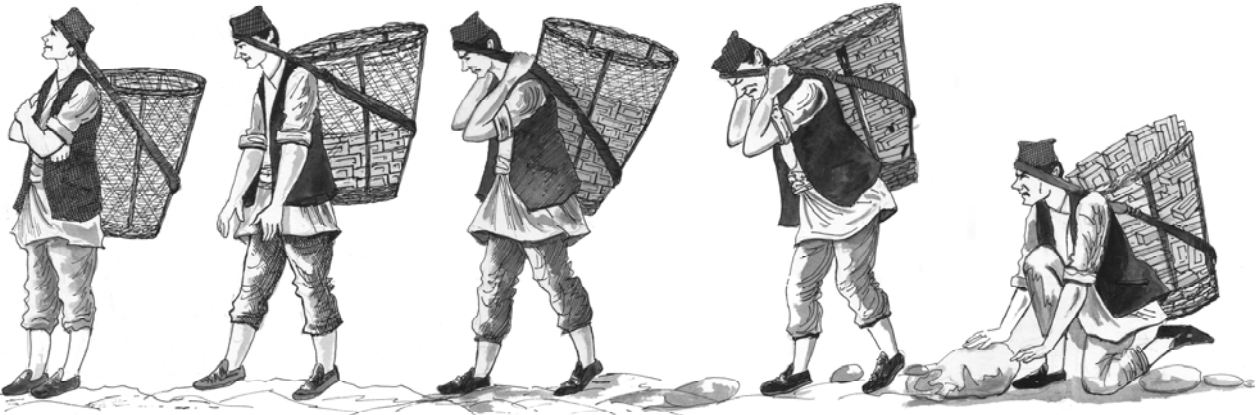

0

1

2

3

4

“not at all”

“extremely/always”

Supplement: MOESM3 [file 9478392]
